# Supplementary material for: Transformation and Degradation of PAH Mixture in Contaminated Sites: Clarifying Their Interactions with Native Soil Organisms
Source: MDPI journal article supplement (doi:10.3390/toxics12050361), 2024-05-13
Supplement: s1 [file s1]

---

# Supporting Information

## **Transformation and Degradation of PAHs Mixture in Contaminated Sites: Clarifying Their Interactions with Native Soil Organisms**

Xiaoyu Li<sup>1</sup>, Shengnan Zhang<sup>1</sup>, Ruixue Guo<sup>1</sup>, Xuejing Xiao<sup>1</sup>, Boying Liu<sup>1</sup>, Rehab Khaled. Mahmoud<sup>2</sup>, Mostafa R. Abukhadra<sup>3</sup>, Ruijuan Qu<sup>1</sup>, and Zunyao, Wang<sup>1,\*</sup>

1. State Key Laboratory of Pollution Control and Resources Reuse, School of the Environment, Nanjing University, Nanjing 210023, Jiangsu, PR China; quruijuan0404@nju.edu.cn (R.Q.); wangzy@nju.edu.cn (Z.W.).

2. Faculty of science, Beni Suef University, Beni-Suef, Egypt; rehabkhaled@science.bsu.edu.eg.

3. Materials Technologies and their applications Lab, Faculty of Science, Beni-Suef University, Beni Suef city, Egypt; abukhadra89@science.bsu.edu.eg.

---

**Text S1** Detailed information of chemicals and reagents.

Ant (purity  $\geq$  98%), 9-ClAnt (purity  $\geq$  97%), Chr (purity  $\geq$  97%) and BaP (purity  $\geq$  98%) were obtained from Macklin Co., Ltd. (Shanghai, China). The stock solutions of PAHs were prepared at a concentration of 1.0 g/L in acetone and stored at 4 °C in the dark. Ultrapure water was generated from a Milli-Q water purification system (18.25 M $\Omega$ ·cm, Millipore, Bedford, USA). Chromatographic grade n-hexane, acetone, and methanol were supplied by Merck (Darmstadt, Germany).

---

**Text S2** Pollution of PAHs in the soil of the three industrial parks.

The sampling points from the three industrial parks all showed varying degrees of PAHs pollution. The concentrations of 16 USEPA priority PAHs were measured by EPA 8270E and EPA 3545A standard methods. The total concentrations of 12 PAHs (Phenanthrene, Anthracene, Fluoranthene, Pyrene, 1,2-Benzanthracene, Chrysene, Benzo(b)fluoranthene, Benzo(k)fluoranthene, Benzo(a)pyrene, Indeno(1.2.3-c,d)pyrene, Dibenzo(a,h)anthracene, Benzo(g,h,i)perylene) were measured to be 39 mg/kg and 7 mg/kg in SH and HD soil, respectively. By contrast, the total concentration of 16 priority PAHs in the soil samples collected from HS soil was relatively low, while benzo(a)pyrene (700 µg/kg) was found to exceed the Risk Control Standard for Soil Contamination of Development Land (DB13/T 5216-2020).

---

### **Text S3. Detailed information of the pot experiments.**

After stones and large plant residuals were removed, the collected soils were air-dried, and ground to 60 mesh particles for use. Different volumes of PAHs stock solutions were added to the soil samples, which were placed in dark in the fume hood to allow for natural evaporation of organic solvent. 500 g PAHs-contaminated soils were packed into each of the plastic pots (15.5 cm diameter × 15.0 cm height). Soils were watered and equilibrated for 7 days before sowing seeds of ryegrass which were purchased from Jiangsu Leerda Seed Industry Co., LTD (Jiangsu, China). Whole seeds of the same size were selected, sterilized in a 3% hydrogen peroxide solution for 20 min, and then washed three times with water. After natural air drying, the seeds were used for sowing, and 5 seedlings with good growth were reserved in each pot. The experimental period lasted from September to November of 2022 in a greenhouse at Nanjing University (Nanjing, China, 32.12°N, 118.96°E), under natural light irradiation. The pot experiments were conducted from September to November. During the pot experiments, soil moisture was kept at 60% of field water capacity, and plant height was recorded on the first day and every two days thereafter. The pots were placed in a culture room at a constant temperature of  $25 \pm 2^{\circ}\text{C}$ , and the positions of the pots were randomly changed every two days. On the 7<sup>th</sup>, 14<sup>th</sup>, 28<sup>th</sup>, 42<sup>nd</sup>, and 56<sup>th</sup> day since sowing, a soil column (1 cm diameter, 10 cm height) was collected from each pot for quantitative analysis of PAHs and identification of transformation products.

---

**Text S4** Detailed process of HPLC, HPLC-MS, and GC-MS analysis.

#### *HPLC analysis*

Quantification of PAHs was performed on an HPLC instrument (Flexar, PerkinElmer, USA) equipped with an L-2300 pump and an L-2420 UV–vis detector. Separation of components was conducted through a Zorbax SB-C18 column ( $4.6 \times 150$  mm,  $5\ \mu\text{m}$ ) with the column temperature maintained at  $30\ ^\circ\text{C}$ . Other information for the test conditions of the four PAHs were listed in [Table S4](#). The standard curve of peak area and solution concentration could be seen in [Figure S3](#).

#### *HPLC-MS analysis*

The polar products were identified by an Agilent 1260 Infinity HPLC system coupled with a high-resolution quadrupole time-of-flight mass spectrometer (Triple TOF 5600, AB Sciex, USA), which was operated with an electrospray ionization (ESI) source in negative mode to record the full scanning spectrum ( $m/z$  50–1500). Ten microliter samples were eluted on a Thermo BDS Hypersil C18 column ( $100 \times 2.1$  mm,  $2.4\ \mu\text{m}$  particle size) for separation. The mobile phase consisting of 0.1% formic acid in water (A) and methanol (B) was eluted at a flow rate of  $0.2\ \text{mL min}^{-1}$ . The gradient elution program was performed according to our previous study [[1](#)]. It started at 90% A for 2 min, decreased to 10% A in 1 min and kept for 23 min, then returned to the starting condition in 1 min and equilibrated for 8 min.

#### *GC-MS analysis*

The products with weak or even no polarity were identified by a TSQ Quantum gas chromatograph-mass spectrometer (GC-MS, Thermo Scientific, USA) equipped with an electron ionization (EI) source. Two-microliter samples were injected into a DB-5MS capillary column (30 m

---

length  $\times$  0.25  $\mu\text{m}$  film thickness, 320  $\mu\text{m}$  i.d., J&K Scientific, USA) under splitless mode. Nitrogen (purity  $> 99.999\%$ ) was used as the carrier gas, and the flow rate was  $1.2\text{ mL min}^{-1}$ . The temperatures of injector, ion source and transfer line were  $280\text{ }^{\circ}\text{C}$ ,  $250\text{ }^{\circ}\text{C}$  and  $280\text{ }^{\circ}\text{C}$ , respectively. The column temperature was initially held at  $80\text{ }^{\circ}\text{C}$  for 1 min, increased at  $25\text{ }^{\circ}\text{C min}^{-1}$  to  $200\text{ }^{\circ}\text{C}$  and maintained for 2 min, then ramped at  $1\text{ }^{\circ}\text{C min}^{-1}$  to  $213\text{ }^{\circ}\text{C}$  and kept for 1 min. Full scanning MS spectrum ( $m/z$  50–500) was recorded.

---

**Text S5** Detailed process of the sequencing process.

### ***DNA Extraction***

Total genomic DNA samples were extracted using the OMEGA Soil DNA Kit (M5635-02) (Omega Bio-Tek, Norcross, GA, USA), following the manufacturer's instructions, and stored at -20 °C prior to further analysis. The quantity and quality of extracted DNAs were measured using a NanoDrop NC2000 spectrophotometer (Thermo Fisher Scientific, Waltham, MA, USA) and agarose gel electrophoresis, respectively.

### ***16S rRNA Gene Amplicon Sequencing***

PCR amplification of the bacterial 16S rRNA genes V3–V4 region was performed using the forward primer 338F (5'-ACTCCTACGGGAGGCAGCA-3') and the reverse primer 806R (5'-GGACTACHVGGGTWTCTAAT-3'). Sample-specific 7-bp barcodes were incorporated into the primers for multiplex sequencing. The PCR components contained 5 µL of buffer (5×), 0.25 µl of Fast pfu DNA Polymerase (5U/µL), 2 µl (2.5 mM) of dNTPs, 1 µL (10 uM) of each Forward and Reverse primer, 1 µL of DNA Template, and 14.75 µL of ddH<sub>2</sub>O. Thermal cycling consisted of initial denaturation at 98 °C for 5 min, followed by 25 cycles consisting of denaturation at 98 °C for 30 s, annealing at 53 °C for 30 s, and extension at 72 °C for 45 s, with a final extension of 5 min at 72 °C. PCR amplicons were purified with Vazyme VAHTSTM DNA Clean Beads (Vazyme, Nanjing, China) and quantified using the Quant-iT PicoGreen dsDNA Assay Kit (Invitrogen, Carlsbad, CA, USA). After the individual quantification step, amplicons were pooled in equal amounts, and pair-end 2×250 bp sequencing was performed using the Illumina NovaSeqplatform with NovaSeq 6000 SP Reagent Kit (500 cycles).

### ***Sequence Analysis***

Microbiome bioinformatics were performed with QIIME2 2019.4 [2] with slight modifications according to the official tutorials (<https://docs.qiime2.org/2019.4/tutorials/>). Briefly, raw sequence data were demultiplexed using the demux plugin followed by primers cutting with cutadapt plugin [3]. Sequences were then quality filtered, denoised, merged and chimera removed using the DADA2 plugin [4]. Non-singleton amplicon sequence variants (ASVs) were aligned with mafft [5] and used to construct a phylogeny with fasttree2 [6].

---

**Table S1** Physicochemical properties of the soil samples used in the experiment.

| Area     | Soil type  | Soil texture (% , mm) |            |        | pH   | Soil organic carbon<br>(SOC, g/kg) | Cation exchange capacity<br>(CEC, cmol/kg) |
|----------|------------|-----------------------|------------|--------|------|------------------------------------|--------------------------------------------|
|          |            | <0.002                | 0.05-0.002 | 2-0.05 |      |                                    |                                            |
| Handan   | Sandy loam | 6.85                  | 34.41      | 58.74  | 8.06 | 12.47                              | 13.55                                      |
| Hengshui | Loam       | 12.56                 | 41.71      | 45.73  | 7.55 | 21.32                              | 9.82                                       |
| Shanghai | Silt Loam  | 17.36                 | 50.73      | 31.91  | 8.10 | 22.38                              | 10.24                                      |



---

**Table S2** The concentration gradients of PAHs.

| PAHs (mg/kg) | Chr | Ant | 9-ClAnt | BaP | Sum. |
|--------------|-----|-----|---------|-----|------|
| PAHs-1       | 25  | 5   | 5       | 15  | 50   |
| PAHs-2       | 125 | 25  | 25      | 75  | 250  |
| PAHs-3       | 500 | 100 | 100     | 300 | 1000 |

---

**Table S3** The initial concentration of PAHs after artificial contamination (mg/kg).

|       | HD_1  | HD_2   | HD_3   | HS_1 | HS_2   | HS_3   | SH_1  | SH_2   | SH_3   |
|-------|-------|--------|--------|------|--------|--------|-------|--------|--------|
| Ant   | 2.51  | 19.69  | 84.47  | 4.00 | 20.08  | 96.33  | 4.71  | 24.46  | 93.80  |
| 9-Ant | 4.56  | 24.10  | 88.34  | 6.23 | 28.44  | 105.37 | 4.02  | 25.13  | 98.01  |
| BaP   | 11.61 | 79.70  | 273.40 | 9.40 | 60.10  | 284.12 | 15.86 | 68.99  | 320.17 |
| Chr   | 10.69 | 115.52 | 477.02 | 9.52 | 111.07 | 511.32 | 16.99 | 118.43 | 452.33 |

---

**Table S4** HPLC detection methods for the PAHs used in the study.

| PAHs    | Detection<br>wavelength (nm) | Flow rate<br>(mLmin <sup>-1</sup> ) | Mobile phase |                     |
|---------|------------------------------|-------------------------------------|--------------|---------------------|
|         |                              |                                     | Acetonitrile | Aqueous formic acid |
| Chr     | 268                          | 1.35                                | 20           | 80                  |
| Ant     | 253                          | 1.35                                | 15           | 85                  |
| 9-ClAnt | 265                          | 1.35                                | 15           | 85                  |
| BaP     | 290                          | 1.35                                | 5            | 95                  |

**Table S5** Contents of 4 PAHs in ryegrass after 56 days of growth.

| Samples (μg/kg) |         | Ant       | BaP       | Chr       | 9-ClAnt   |
|-----------------|---------|-----------|-----------|-----------|-----------|
| Handan (HD)     | PAHs-P1 | 0.36±0.06 | 0.24±0.03 | 0.59±0.14 | 0.61±0.10 |
|                 | PAHs-P2 | 0.72±0.14 | 0.80±0.11 | 2.04±0.24 | 0.38±0.08 |
|                 | PAHs-P3 | 1.14±0.32 | 1.17±0.21 | 2.18±0.37 | 0.32±0.11 |
| Shanghai (SH)   | PAHs-P1 | 0.47±0.09 | 0.45±0.10 | 2.13±0.24 | 0.32±0.03 |
|                 | PAHs-P2 | 0.52±0.11 | 0.73±0.24 | 4.68±0.08 | 0.88±0.10 |
|                 | PAHs-P3 | 0.57±0.05 | 0.86±0.19 | 6.34±0.35 | 0.46±0.12 |

---

**Table S6** The effectiveness of sequencing results of the vegetation groups.

| SampleID | Input  | Non-chimeric | Validity (%) |
|----------|--------|--------------|--------------|
| SH_BK    | 133258 | 122070       | 91.6         |
| SH_P1    | 135489 | 122198       | 90.2         |
| SH_P2    | 137111 | 124575       | 90.9         |
| SH_P3    | 130533 | 119058       | 91.2         |
| HD_BK    | 164475 | 152058       | 92.5         |
| HD_P1    | 83826  | 74406        | 88.8         |
| HD_P2    | 97664  | 89936        | 92.1         |
| HD_P3    | 77185  | 69617        | 90.2         |
| HS_BK    | 69493  | 63011        | 90.1         |
| HS_P1    | 98772  | 89713        | 90.1         |
| HS_P2    | 114729 | 103677       | 90.4         |
| HS_P3    | 72875  | 67533        | 92.7         |

**Table S7** Alpha diversity indices of bacteria and fungi of different soil samples.

| Sample   | Number           | SH_BK | SH_P1 | SH_P2 | SH_P3 | HD_BK  | HD_P1  | HD_P2  | HD_P3  | HS_BK | HS_P1 | HS_P2 | HS_P3 |
|----------|------------------|-------|-------|-------|-------|--------|--------|--------|--------|-------|-------|-------|-------|
| Bacteria | Chao1            | 418.8 | 970.2 | 554.0 | 530.2 | 6035.1 | 1552.0 | 1347.9 | 1320.6 | 475.3 | 39.3  | 58.7  | 27.5  |
|          | Simpson          | 0.956 | 0.932 | 0.981 | 0.974 | 0.995  | 0.993  | 0.984  | 0.988  | 0.969 | 0.925 | 0.985 | 0.922 |
|          | Shannon          | 6.101 | 6.358 | 7.021 | 6.836 | 10.225 | 8.673  | 8.016  | 8.144  | 6.153 | 3.893 | 6.724 | 3.864 |
|          | Observed species | 418   | 969   | 553   | 528   | 5404   | 1545   | 1302   | 1316   | 474   | 37    | 48    | 27    |
|          | Coverage         | 1.00  | 1.00  | 1.00  | 1.00  | 0.98   | 0.99   | 0.98   | 0.99   | 1.00  | 1.00  | 0.99  | 1.00  |
| Fungi    | Chao1            | 95.0  | 105.3 | 108.9 | 101.1 | 134.0  | 8.0    | 17.1   | 44.0   | 24.0  | 29.1  | 25.0  | 8.0   |
|          | Simpson          | 0.535 | 0.834 | 0.809 | 0.846 | 0.720  | 0.605  | 0.560  | 0.866  | 0.613 | 0.127 | 0.065 | 0.018 |
|          | Shannon          | 2.601 | 3.332 | 3.179 | 3.302 | 3.652  | 1.671  | 1.617  | 3.223  | 1.847 | 0.512 | 0.310 | 0.094 |
|          | Observed species | 95    | 105   | 109   | 101   | 134    | 8      | 17     | 44     | 24    | 29    | 25    | 8     |
|          | Coverage         | 0.99  | 0.99  | 0.99  | 0.99  | 1.00   | 1.00   | 0.99   | 0.99   | 0.99  | 0.99  | 0.99  | 0.99  |

**Table S8** Statistical table of species taxonomic annotation results.

|        | Bacteria |       |       |        |       | Fungi  |       |       |        |       |
|--------|----------|-------|-------|--------|-------|--------|-------|-------|--------|-------|
| Sample | Phylum   | Class | Order | Family | Genus | Phylum | Class | Order | Family | Genus |
| SH_BK  | 16       | 32    | 63    | 91     | 117   | 2      | 9     | 14    | 17     | 20    |
| SH_P1  | 21       | 38    | 78    | 130    | 201   | 2      | 9     | 13    | 15     | 22    |
| SH_P2  | 16       | 27    | 63    | 94     | 141   | 4      | 10    | 14    | 19     | 26    |
| SH_P3  | 15       | 33    | 63    | 95     | 140   | 3      | 9     | 14    | 17     | 19    |
| HD_BK  | 19       | 54    | 111   | 174    | 269   | 3      | 10    | 20    | 31     | 46    |
| HD_P1  | 20       | 56    | 107   | 166    | 243   | 1      | 2     | 3     | 3      | 2     |
| HD_P2  | 18       | 40    | 81    | 127    | 185   | 3      | 7     | 15    | 22     | 23    |
| HD_P3  | 19       | 45    | 94    | 144    | 222   | 1      | 3     | 5     | 5      | 4     |
| HS_BK  | 8        | 16    | 30    | 43     | 48    | 1      | 3     | 6     | 7      | 8     |
| HS_P1  | 6        | 8     | 12    | 12     | 10    | 2      | 6     | 9     | 11     | 10    |
| HS_P2  | 8        | 19    | 36    | 45     | 59    | 1      | 2     | 3     | 3      | 3     |
| HS_P3  | 3        | 7     | 11    | 14     | 11    | 3      | 6     | 9     | 9      | 7     |

**Table S9** The relative abundance of fungal communities in Shanghai, Handan and Henshui soils with different PAHs concentrations.

| Sample | Relative abundance (%) |               |              |                   |               |                    |                   |        |
|--------|------------------------|---------------|--------------|-------------------|---------------|--------------------|-------------------|--------|
|        | Ascomycota             | Basidiomycota | Mucoromycota | Mortierellomycota | Rozellomycota | Blastocladiomycota | Mortierellomycota | Others |
| SH_BK  | 10.8                   | 2.8           | /            | /                 | /             | /                  | /                 | 86.4   |
| SH_P1  | 53.0                   | 0.2           | /            | /                 | /             | /                  | /                 | 46.8   |
| SH_P2  | 26.1                   | *             | *            | /                 | *             | /                  | /                 | 73.8   |
| SH_P3  | 16.7                   | 0.2           | *            | /                 | /             | /                  | /                 | 83.0   |
| HD_BK  | 91.0                   | 2.8           | /            | /                 | /             | /                  | 2.7               | 3.5    |
| HD_P1  | 99.9                   | /             | /            | /                 | /             | /                  | /                 | 0.1    |
| HD_P2  | 43.8                   | *             | /            | /                 | /             | /                  | *                 | 56.1   |
| HD_P3  | 89.2                   | /             | /            | /                 | /             | /                  | /                 | 10.8   |
| HS_BK  | 99.9                   | /             | /            | /                 | /             | /                  | /                 | *      |
| HS_P1  | 99.9                   | *             | /            | /                 | /             | /                  | /                 | /      |
| HS_P2  | 1                      | /             | /            | /                 | /             | /                  | /                 | /      |
| HS_P3  | 98.9                   | *             | /            | /                 | /             | *                  | /                 | 1.1    |

Note that \* represents the relative abundance is lower than 0.01%, and / represents no detection.



**Table S10.** Accurate mass measurements of the degradation products of 4 PAHs as determined by HPLC-TOF-MS/MS.

| Compound | Retention<br>time<br>( $R_t$ , min) | Molecular<br>formula                           | Experimental<br>mass<br>( $m/z$ ) | Calculated<br>mass<br>( $m/z$ ) | Error<br>(ppm) |
|----------|-------------------------------------|------------------------------------------------|-----------------------------------|---------------------------------|----------------|
| P194(-)  | 8.127                               | C <sub>14</sub> H <sub>10</sub> O              | 193.0658                          | 193.0672                        | 5.69           |
| P238(-)  | 12.46                               | C <sub>15</sub> H <sub>10</sub> O <sub>3</sub> | 237.0557                          | 237.0554                        | -1.27          |
| P224(-)  | 10.29                               | C <sub>11</sub> H <sub>7</sub> O <sub>5</sub>  | 223.0400                          | 223.0388                        | -5.38          |
| P284(-)  | 11.53                               | C <sub>20</sub> H <sub>12</sub> O <sub>2</sub> | 283.0764                          | 283.0743                        | -7.42          |
| P248(-)  | 12.73                               | C <sub>17</sub> H <sub>12</sub> O <sub>2</sub> | 247.0764                          | 247.0768                        | 1.62           |
| P260(-)  | 11.25                               | C <sub>18</sub> H <sub>12</sub> O <sub>2</sub> | 259.0764                          | 259.0774                        | 3.86           |
| P288(-)  | 11.45                               | C <sub>19</sub> H <sub>12</sub> O <sub>3</sub> | 287.0713                          | 287.0702                        | -3.82          |
| P360(-)  | 13.02                               | C <sub>21</sub> H <sub>12</sub> O <sub>6</sub> | 359.1077                          | 359.1067                        | -2.79          |

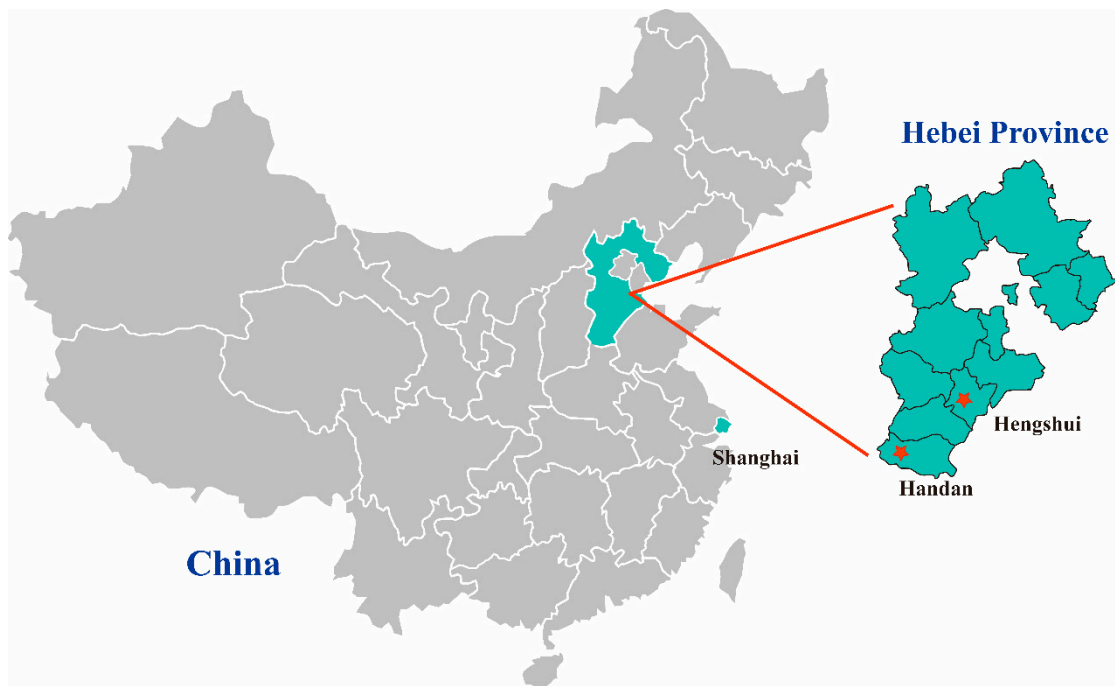

**Figure S1** Location of the three industrial parks in China.

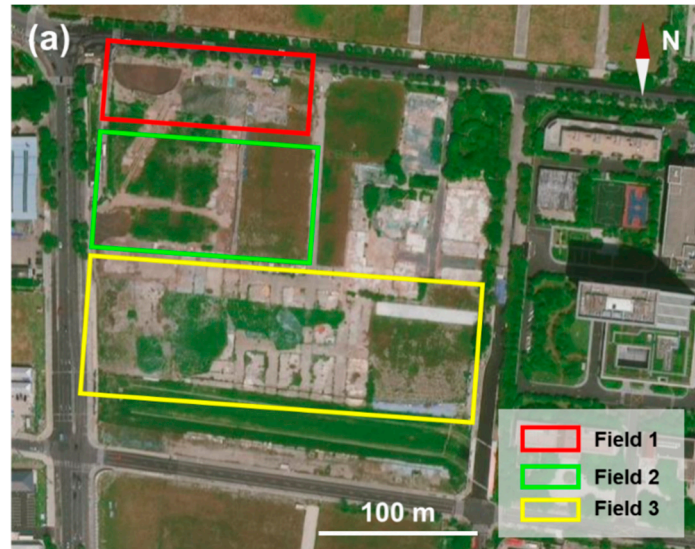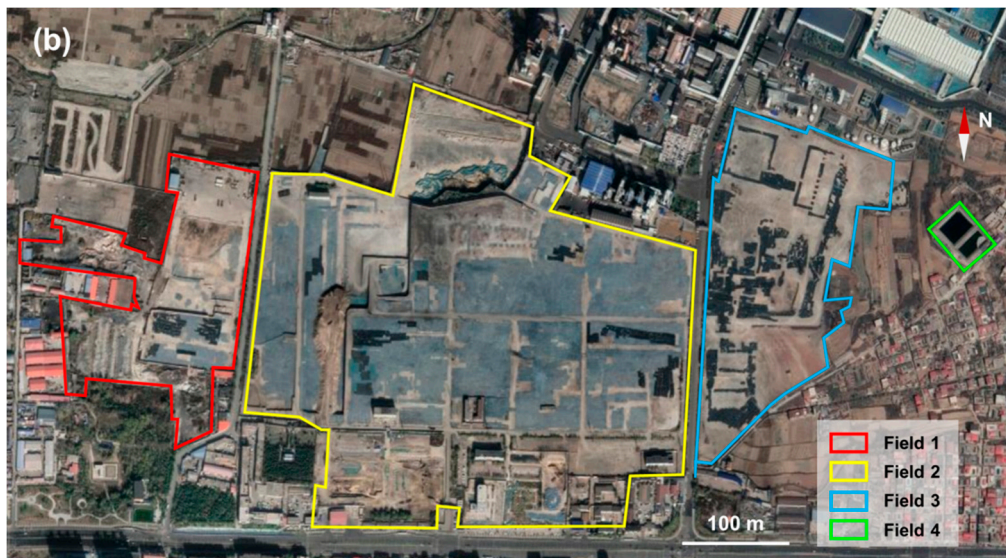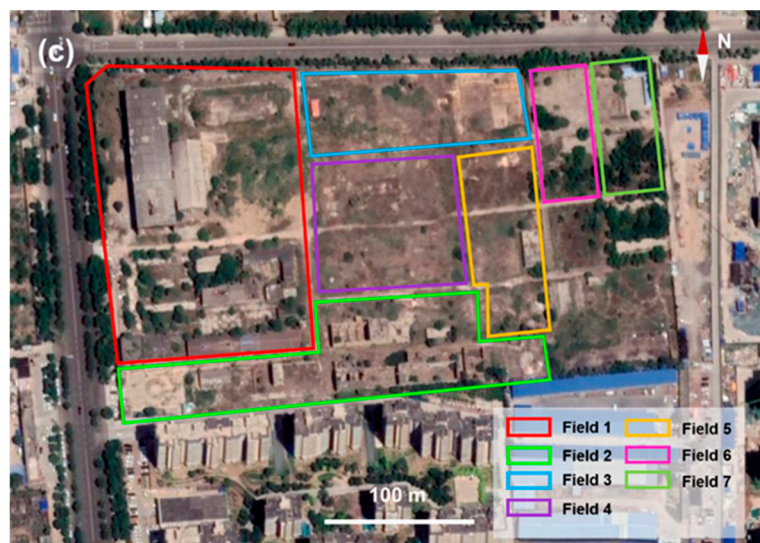

**Figure S2** Sampling sites in Shanghai (a) Handan (b) and Hengshui (c).

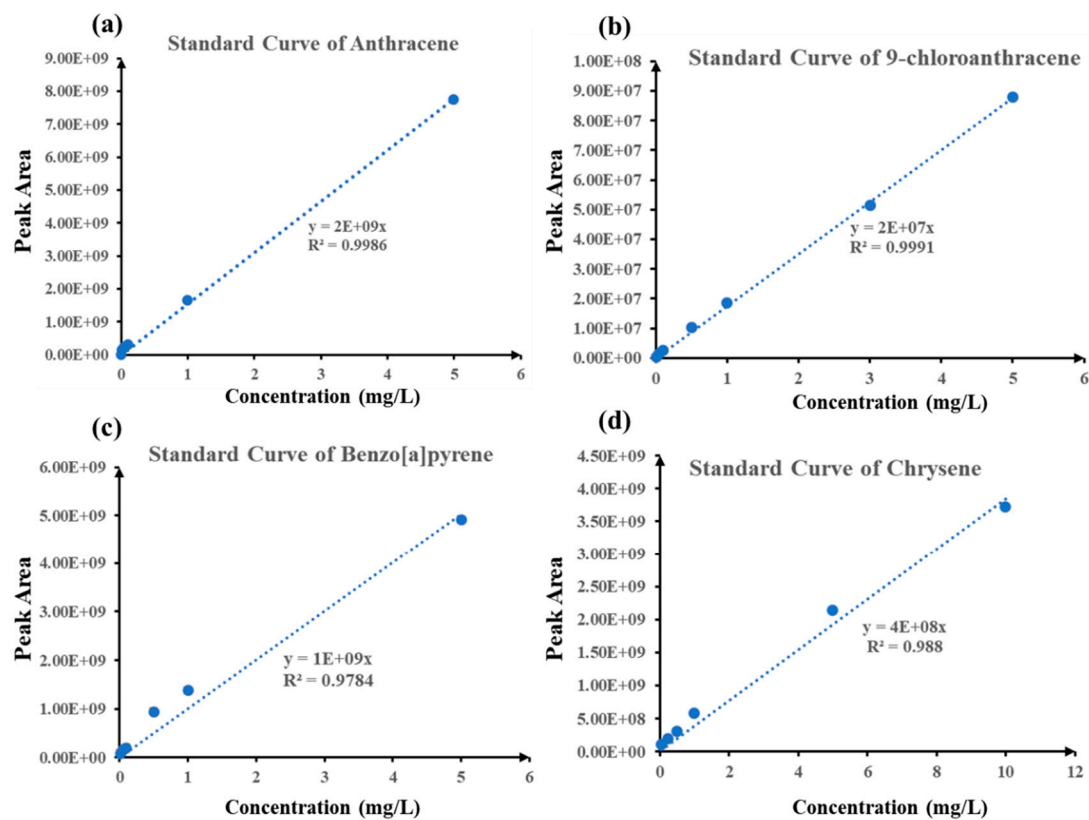

**Figure S3** The standard curve of peak area and solution concentration for Ant (a), 9-ClAnt (b), BaP (c) and Chr (d).

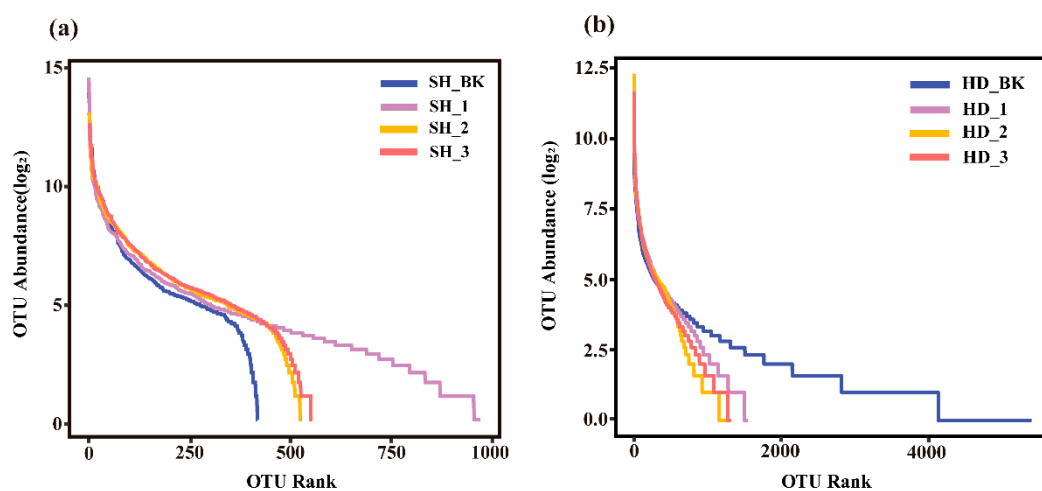

**Figure S4** The rank abundance curve of bacteria in Shanghai (a) and Handan (b) soil samples.

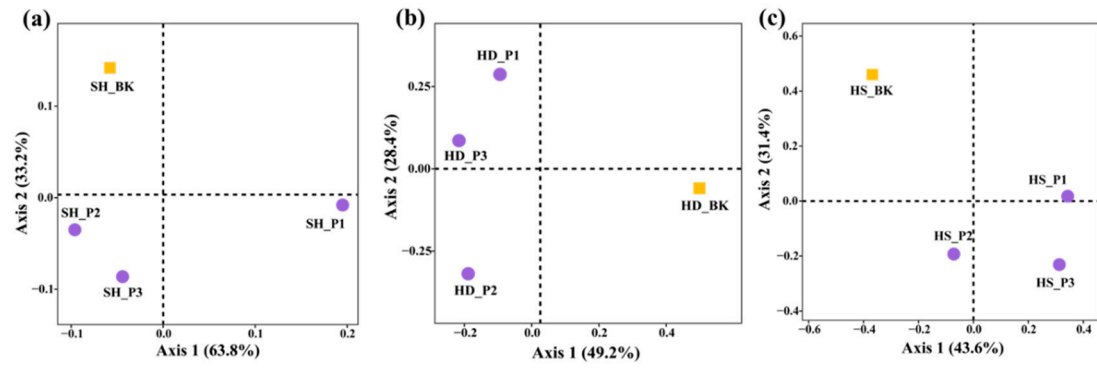

**Figure S5** PCoA profile of community dissimilarity indices (Bray–Curtis) calculated from the OUT tables of different soils of Shanghai (a), Handan (b) and Hengshui (c). (BK: Control group without contamination, P1: 50 mg/kg, P2: 250 mg/kg; P3: 1000 mg/kg)

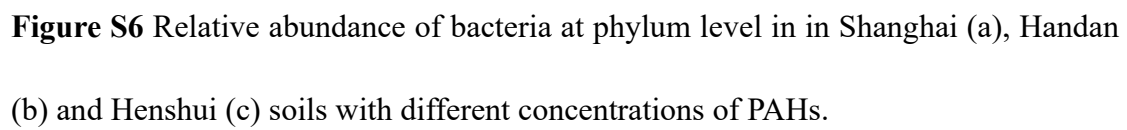

**Figure S6** Relative abundance of bacteria at phylum level in in Shanghai (a), Handan (b) and Henshui (c) soils with different concentrations of PAHs.

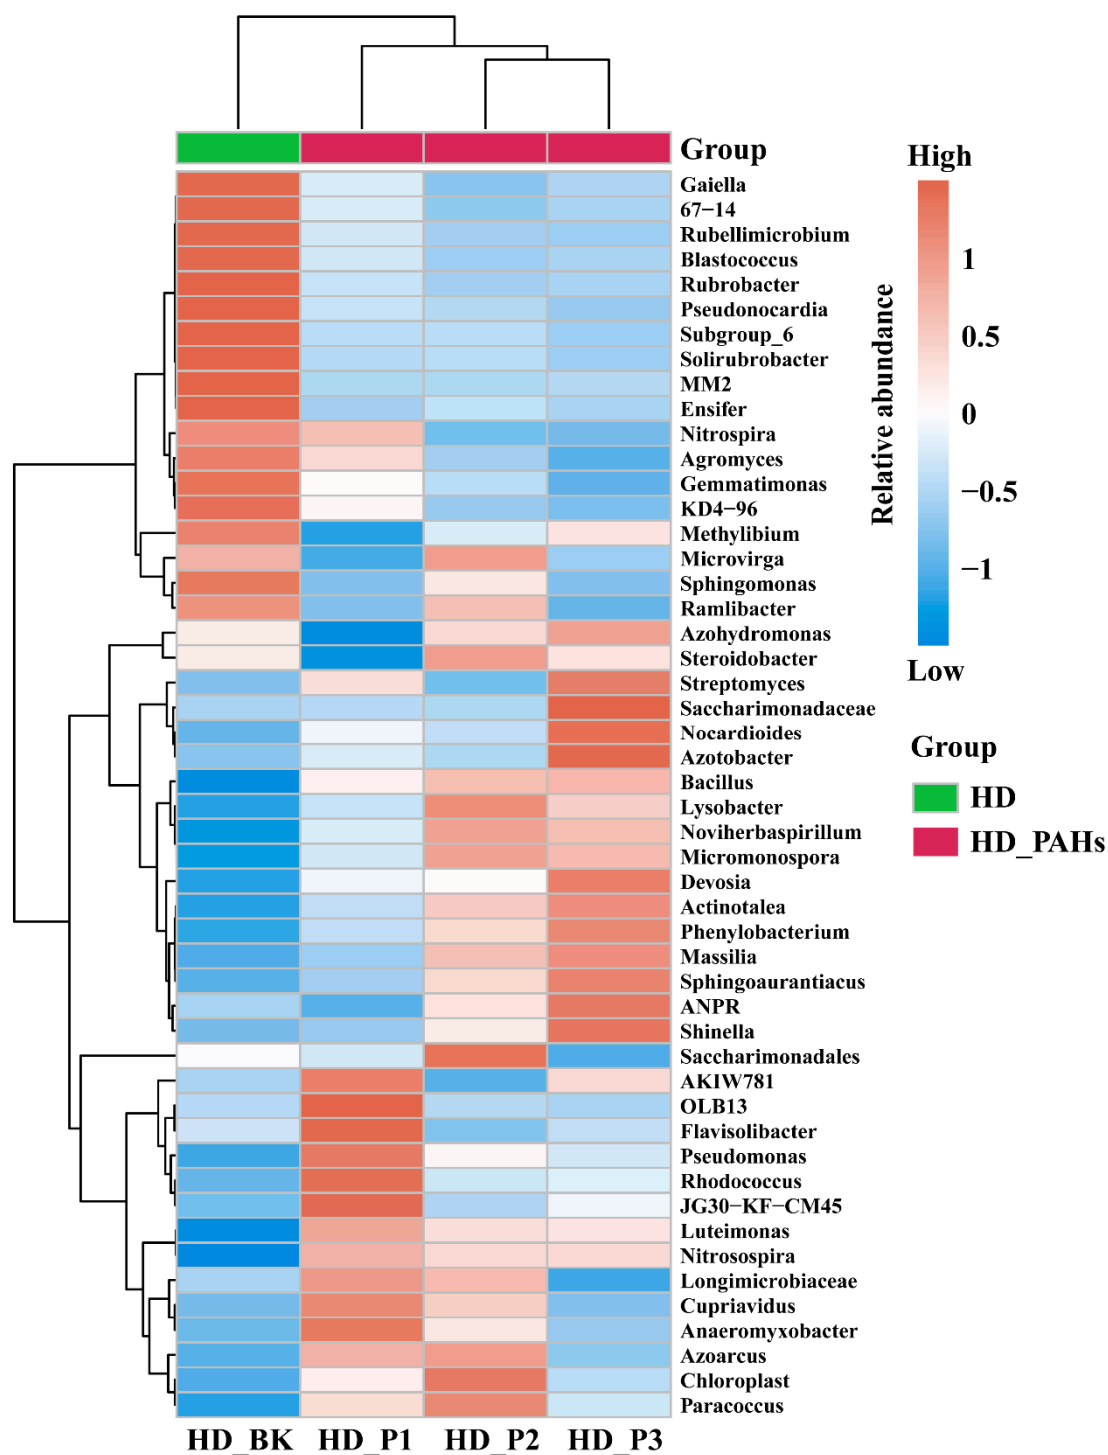

**Figure S7** Comparative heatmap of bacteria in Handan soil samples. (The abundance data of the top 50 genera based on average abundance was used, the red blocks indicate that the abundance of the genus in this sample is higher compared to other samples while the blue blocks suggest that the abundance in this sample was lower than other samples.)



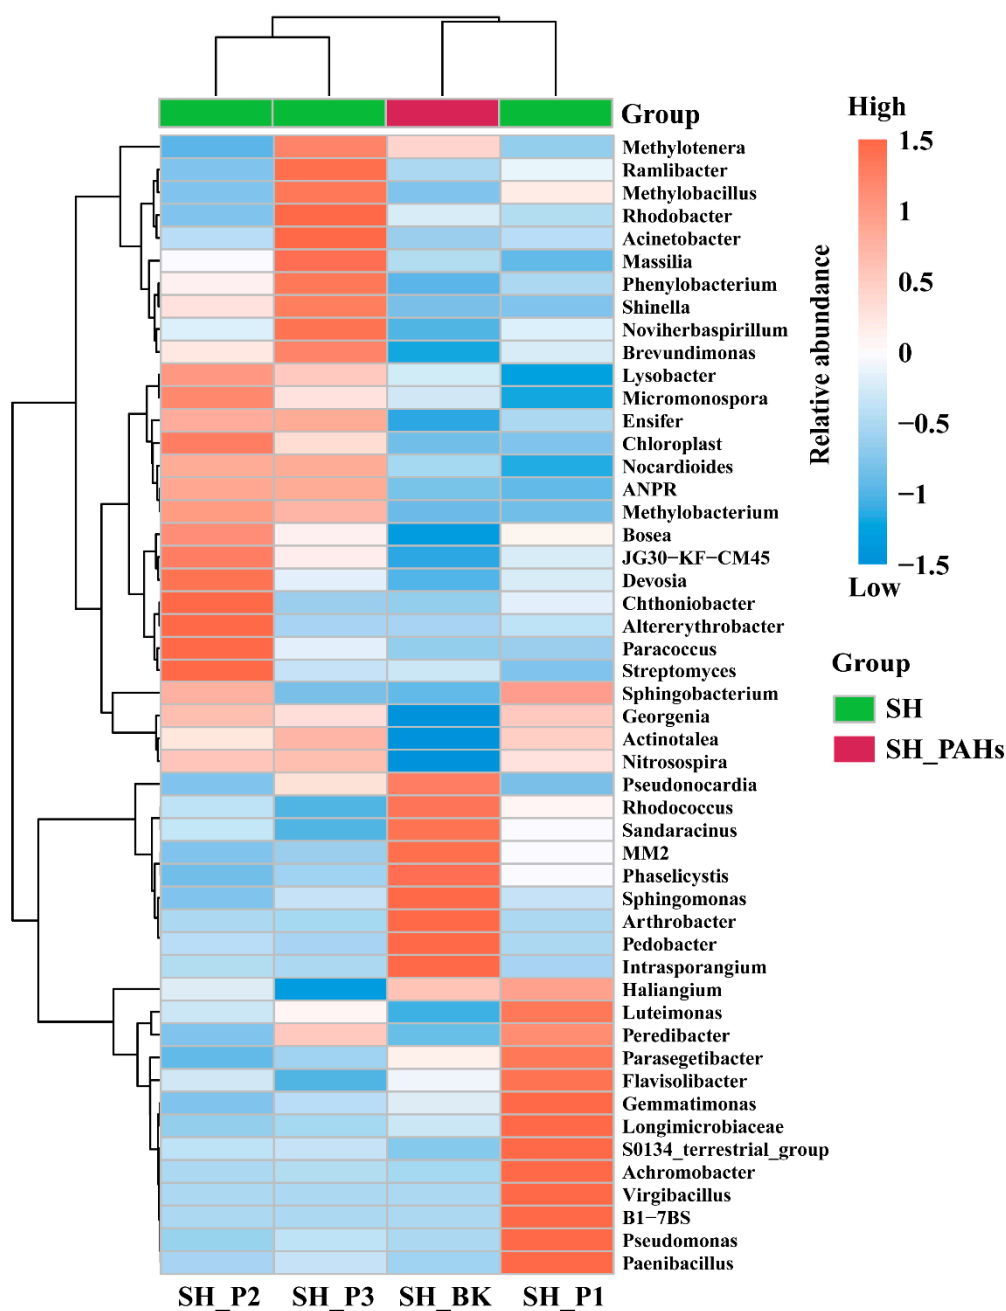

**Figure S8** Comparative heat map of bacteria in Shanghai soil samples. (The abundance data of the top 50 genera based on average abundance was used, the red blocks indicate that the abundance of the genus in this sample is higher compared to other samples while the blue blocks suggest that the abundance in this sample was lower than other samples.)

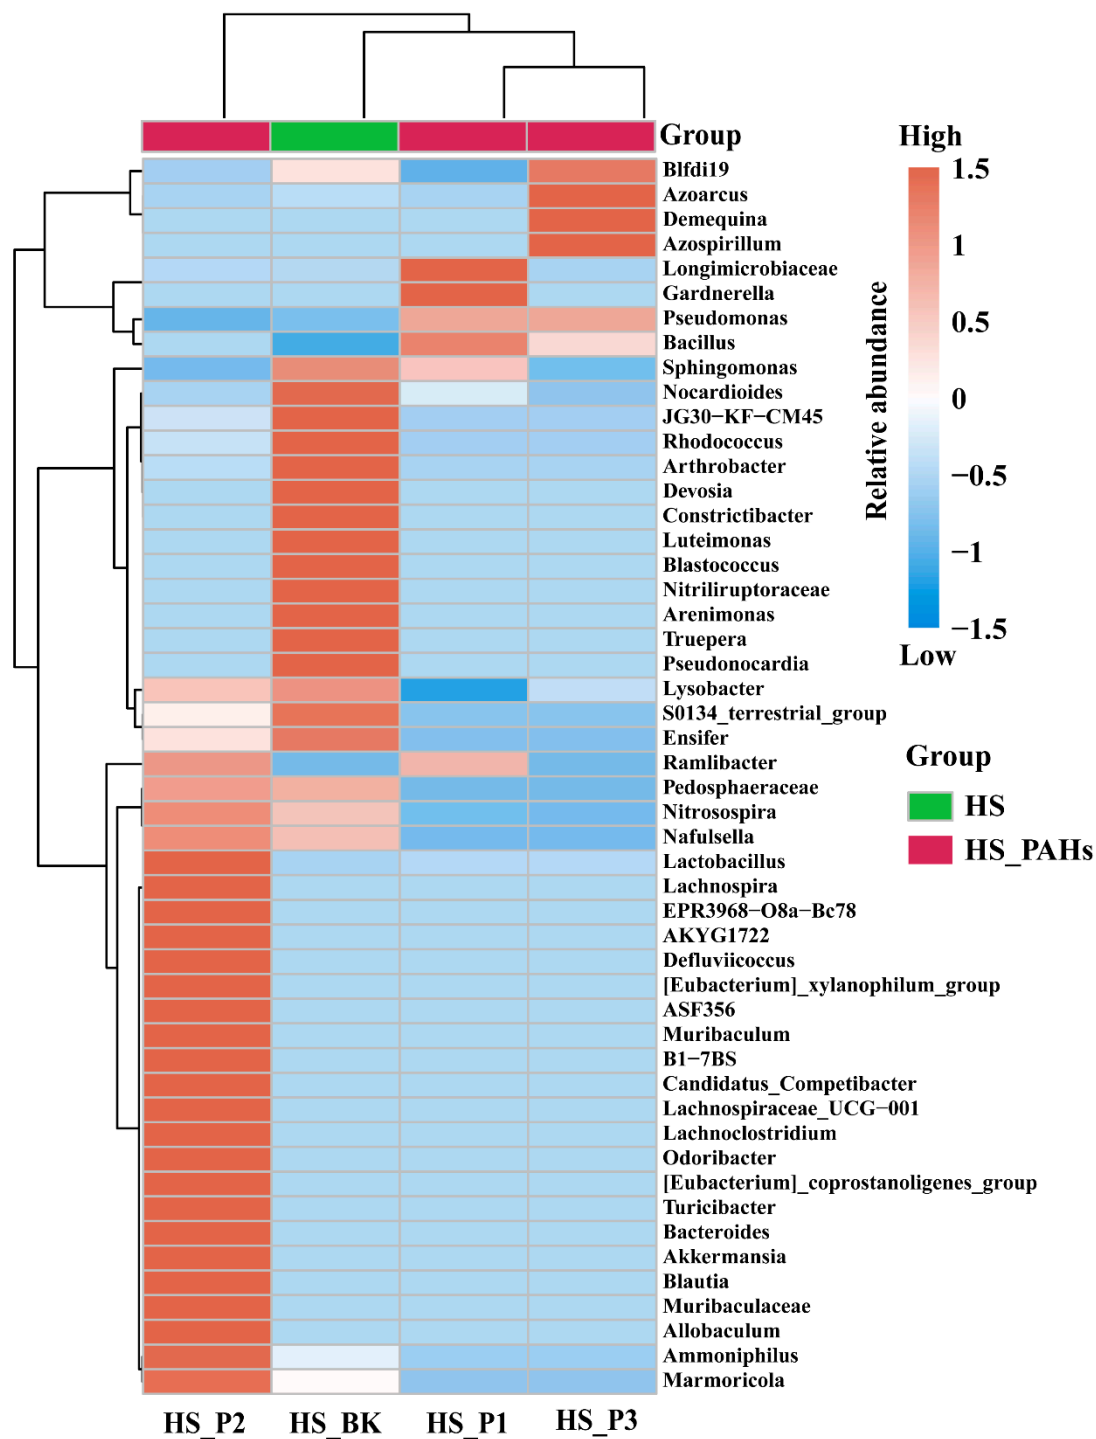

**Figure S9** Comparative heatmap of bacteria in Hengshui soil samples. (The abundance data of the top 50 genera based on average abundance was used, the red blocks indicate that the abundance of the genus in this sample is higher compared to other samples while the blue blocks suggest that the abundance in this sample was lower than other samples.)

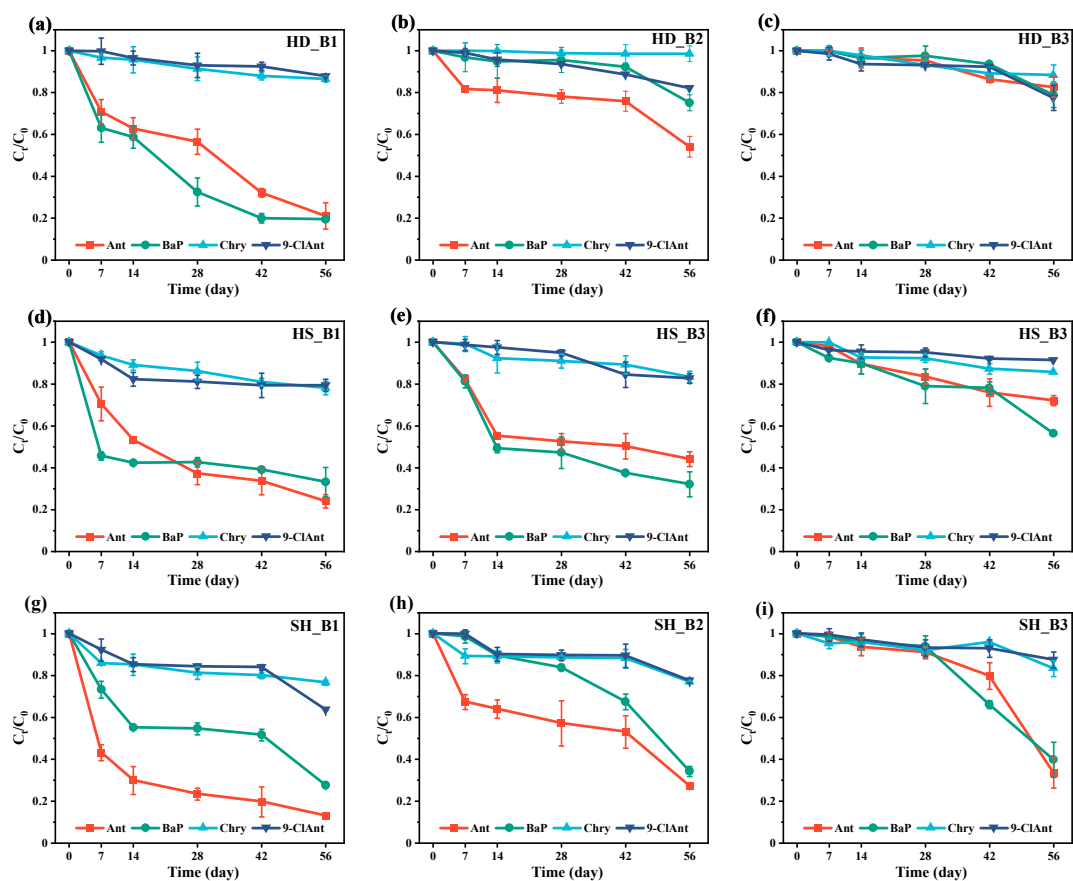

**Figure S10** The degradation of PAHs in Handan (a-c), Hengshui (d-f) and Shanghai (g-i) soils in dark with no planting of ryegrass. (SH: Shanghai, HD: Handan, HS: Hengshui; C1: 50 mg/kg, C2: 250 mg/kg; C3: 1000 mg/kg)

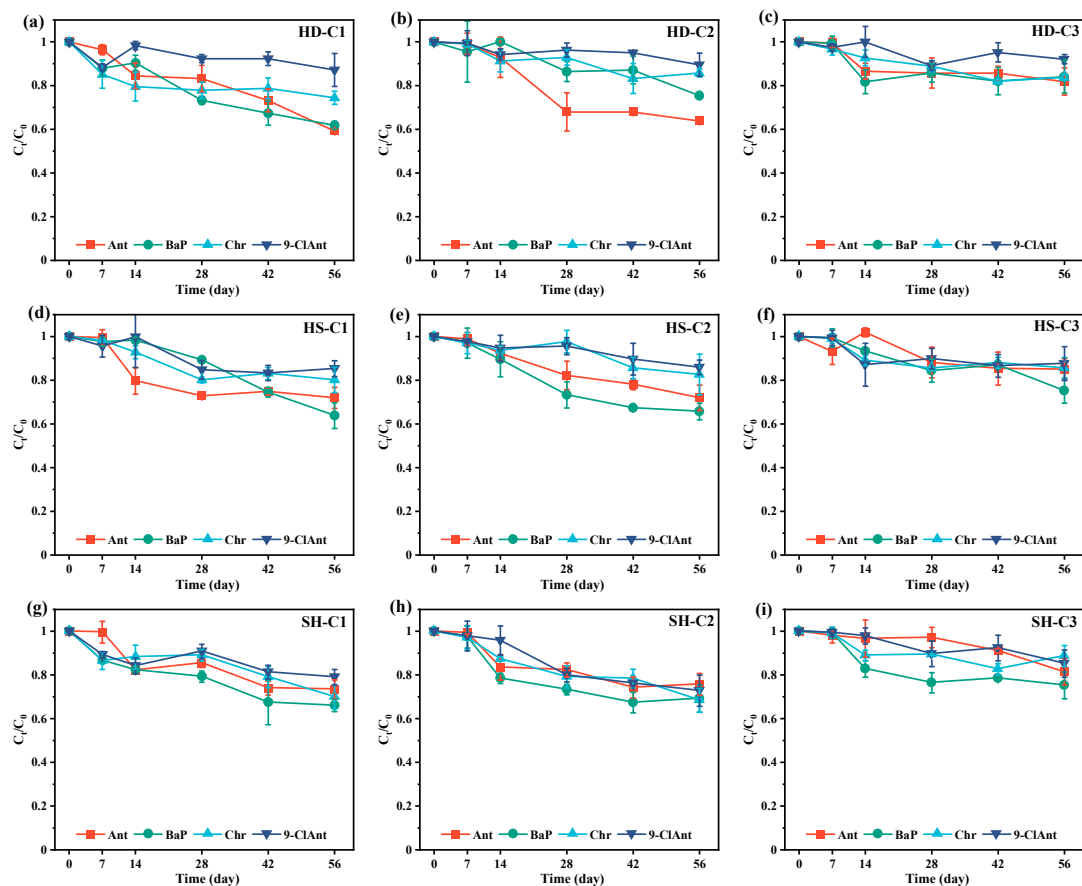

**Figure S11** The loss of PAHs in Handan (a-c), Hengshui (d-f) and Shanghai (g-i) soils in dark with sterilization and no planting of ryegrass. (SH: Shanghai, HD: Handan, HS: Hengshui; C1: 50 mg/kg, C2: 250 mg/kg; C3: 1000 mg/kg)

---

## Reference

1. Tu, Z., Qi, Y., Tang, X., Wang, Z. and Qu, R. 2023. Photochemical transformation of anthracene (ANT) in surface soil: Chlorination and hydroxylation. *J Hazard Mater* 452, 131252.
2. E. Bolyen, J.R. Rideout, M.R. Dillon, N.A. Bokulich, C.C. Abnet, G.A. Al-Ghalith, H. Alexander, E.J. Alm, M. Arumugam, F. Asnicar, Y. Bai, J.E. Bisanz, K. Bittinger, A. Brejnrod, C.J. Brislawn, C.T. Brown, B.J. Callahan, A.M. Caraballo-Rodríguez, J. Chase, E.K. Cope, R. Da Silva, C. Diener, P.C. Dorrestein, G.M. Douglas, D.M. Durall, C. Duvallet, C.F. Edwardson, M. Ernst, M. Estaki, J. Fouquier, J.M. Gauglitz, S.M. Gibbons, D.L. Gibson, A. Gonzalez, K. Gorlick, J. Guo, B. Hillmann, S. Holmes, H. Holste, C. Huttenhower, G.A. Huttley, S. Janssen, A.K. Jarmusch, L. Jiang, B.D. Kaehler, K.B. Kang, C.R. Keefe, P. Keim, S.T. Kelley, D. Knights, I. Koester, T. Kosciulek, J. Kreps, M.G.I. Langille, J. Lee, R. Ley, Y.X. Liu, E. Loftfield, C. Lozupone, M. Maher, C. Marotz, B.D. Martin, D. McDonald, L.J. McIver, A.V. Melnik, J.L. Metcalf, S.C. Morgan, J.T. Morton, A.T. Naimey, J.A. Navas-Molina, L.F. Nothias, S.B. Orchanian, T. Pearson, S.L. Peoples, D. Petras, M.L. Preuss, E. Priesse, L.B. Rasmussen, A. Rivers, M.S. Robeson, 2nd, P. Rosenthal, N. Segata, M. Shaffer, A. Shiffer, R. Sinha, S.J. Song, J.R. Spear, A.D. Swafford, L.R. Thompson, P.J. Torres, P. Trinh, A. Tripathi, P.J. Turnbaugh, S. Ul-Hasan, J.J.J. van der Hooft, F. Vargas, Y. Vázquez-Baeza, E. Vogtmann, M. von Hippel, W. Walters, Y. Wan, M. Wang, J. Warren, K.C. Weber, C.H.D. Williamson, A.D. Willis, Z.Z. Xu, J.R. Zaneveld, Y. Zhang, Q. Zhu, R. Knight, J.G. Caporaso, Reproducible, interactive, scalable and extensible microbiome data science using QIIME 2, *Nat. Biotechnol.* **2019**, 37(8), 852-857.
3. M. Martin, Cutadapt removes adapter sequences from high-throughput sequencing reads, *EMBnet. journal* **2011**, 17, 10-12.
4. Callahan, B. J., Mcmurdie, P. J., Rosen, M. J., Han, A. W., Johnson, A. J., & Holmes, S. P. Dada2: high-resolution sample inference from illumina amplicon data. *Nat. Methods*, **2016**, 13(7), 581-583.

- 
5. Katoh, & K. Mafft: a novel method for rapid multiple sequence alignment based on fast fourier transform. *Nucleic Acids Res.* **2002**, 30(14), 3059-3066.
  6. Price, M.N., Dehal, P.S., and Arkin, A.P. FastTree: computing large minimum evolution trees with profiles instead of a distance matrix. *Mol. Biol. Evol.* **2009**, 26, 1641-1650.
